# Supplementary material for: Implementing integrated care in ophthalmology: a community case study
Source: Front Med (Lausanne). 2023 Dec 27;10:1150525. doi: 10.3389/fmed.2023.1150525 (PMC10777386; doi:10.3389/fmed.2023.1150525)
Supplement: Supplementary file 1 [file Table_1.xlsx]

## Sheet: Mobilisation Plan
INTEGRATION OPHTHALMOLOGY SERVICE PROJECT MOBILISATION PLAN
A REALISTIC GUIDE
Version: X
				Month X						Month Z
				w/c					w/c
Ref	Key Activity	Lead	BRAG							1
1	Contract Variation (CV)
1.01	Finalise CV									GO-LIVE
1.02	Make final revised changes to CV and submit to Contracts Lead
1.03	MEH Contracts Lead to comment on final draft CV
1.04	CCG to agree final draft CV
1.05	Contract Signing with Clinical Commissioning Groups (CCG)
1.06	Contract Signing with Subcontractors/ Community Providers (COP)
2	FINANCE AND REPORTING
2.01	Deep-dive review of reporting requirements
2.02	COP Raw data to be provide to MEH for analysis
2.03	Gap analysis of community data vs CV requirements
2.04	Confirm reporting process for CCG Key Performance Indicators (KPIs)
2.05	Define sub contract reporting KPIs and timeframes
2.06	Meeting to review and diCOPuss MEH/COP reporting data
2.07	End to end testing
2.08	Sign-off
2.09	Assessment of system compatibility
2.1	Agree system integration process
3	Clinical Governance
3.01	Set up governance on mobilisation of OICS									GO-LIVE
3.02	Set up bi-weekly CCG Mobilisation meetings
3.03	Agree attendees and set up post go-live governance of the OICS with MEH & COP
3.04	Incident reporting system in place
3.05	Complaints system in place
3.06	Information Governance pre-requisites met
3.07	Legal framework of optom indemnity clarified
4	Single Point of Access (SPA)
4.01	Comprehensive mapping of current process and referrers									GO-LIVE
4.02	Map 'to be' SPA referral process
4.03	Sign off standardised triage guideline for triagers
4.04	CCG to provide current DXS forms (standardised electronic referral forms ) and clinical pathways
4.05	Review DXS Forms and clinical pathways and amend
4.06	CCG to review and complete changes of DXS forms
4.07	Review DOS and appointment slots mapped to ERS
4.08	COP Triage team identified
4.09	COP Triage team training for revised pathways
4.1	Share new SPA Referral pathway with COP
4.11	COP Sign-off SPA Referral Pathway
4.12	Share new SPA Referral pathway with CCG
4.13	Set up blue button for Adults and Padeiatrics under Moorfields Eye Hospital (MEH)
4.14	Provide names, roles and smartcard details to MEH
4.15	Set COP up with Smartcard Access for ERS
4.16	Trial MEH Blue Buttons
4.17	Sign off MEH Blue Buttons
4.18	Remove current COP blue button
4.19	Sign off new SPA Pathway
4.2	Agree audit protocal for quality of referrasl and triaging
5	COMMUNICATIONS
5.01	Communication via email to announce service change to staff, GP, non-COP optoms, General Practitioners (GP), councillors, Healthwatch, local charities, local pharmacists									GO-LIVE
5.02	Presentation at clinical governance meeting
5.03	Identify affected patients (excludes patients who will be affected by the new Cataract & Glaucoma pathways)
5.04	Send letter to affected patients
5.05	Development of a COP patient information leaflet on the new service
5.06	Development of a healthcare professional information leaflet on the new service
5.07	Plan GP and Optom engagement event
5.07	· 5 min slot at GP protected learning time meeting to share integrated opthamologyl service launch details
5.07	· CCG newsletter communications
5.07	· One half day GP educational event
5.07	· COP Optom engagement event
5.07	· Non COP Optom engagement event
5.09	Produce 5 min on-line video for GPs
5.1	Meet with primary & charity organisations as requested (ongoing post go-live)
6	PATIENT ENGAGEMENT
6.01	Set up patient engagement group e.g. meeting dates, agenda									GO-LIVE
6.02	Cataract Patient Engagement Group
6.03	Glaucoma Patient Engagement Group
6.04	Develop strategy to connect with patient, service user and voluntary sector organisations to develop relationships with diverse communities
6.05	Agree communications/event for patients affected by service change
6.06	Identify patients affected by service change and send comms
7	MR TELE-OPHTHALMOLOGY
7.01	Integration testing
7.02	End to end sign off
7.03	Go Live governance to be confirmed
7.04	Go Live clinics to be identified
7.05	Go Live date to be confirmed
7.06	Training and communications to be agreed
7.07	Training to be delivered
7.08	Communicationss to be circulated
7.09	Go Live
8	POST-OP CATARACT
8.01	Agree Go-live Date
8.02	Agree clinical guidelines
8.03	Agree administrative booking guidelines
8.04	Agree patient pathway for referral back to hospital- emergency, urgent & routine
8.05	Agree post-op outcome reporting - feedback to MEH
8.06	Implement Community Medisoft functionality
8.07	Obtain access to Medisoft for community staff
8.08	Write standard operating procedure (SOP)
8.09	Agree and produce patient information leaflet
8.1	Training needs assessment
8.11	Training packages set up
8.12	Training to be completed
8.13	Communication and training to all OICS staff
8.14	Communication and training to GPs
8.15	Go-live
9	Glaucoma TELE-OPHTHALMOLOGY (Dates to be confirmed - as post 1 Oct Go-live activities)
9.01	Agree Go-live Date
9.02	Agree patient pathway for referral back to hospital- emergency, urgent & routine
9.03	Training needs assessment
9.04	Training packages set up
9.05	Training to be completed
9.06	Agree clinical guidelines
9.07	Agree administrative booking guidelines
9.08	Agree post-op outcome reporting - feedback to MEH
9.09	Agree and produce patient information leaflet
9.1	Communication and training to all OICS staff
9.11	Obtain access to hospital electronic patient records for community staff
9.12	Write SOP
9.13	Go-live Date

## Sheet: Risk & Issues Log
	Risk and Issues Log - Mobilisation Phase: A realistic guide
Date risk/ issue logged	Risk	RAG SxL	Mitigation	RAG SxL	Date updated if applicable
	If there are vacancies in the senior management team of the hospital, then the implementation of the integrated care system may be delayed, resulting in the service not starting on time.	eg 4x4=16	Advertise promptly following resignations Appoint interim cover Set up working groups to mobilise service with a cross section of staff involved Appoint programme manager ZM agreed with Naomi to release newly appontment Asst Div Manager a week earlier	eg 3x2=6
	If there are technical issues with electronic referral system, then referrals may bypass the Single Point of Access (SPA), resulting in inappropriate referrals seen in the HES rather than in the community.		Early involvement of IT in SPA working group Work collaboratively with clinical commissioning group (CCG) and community optometry (COP) to find solution
	If non-COP optoms do not have eRS access then they will not be able to refer via eRS, resulting in referrals bypassing SPA.		Early involvement of IT in SPA working group Work collaboratively with CCG and COP to find solution Non-COP optoms continue to send referrals to GP
	If COP, as sub-contractors do not provide information when requested, then there may be a delay to the mobilisation, resulting in services not starting by the Go-Live date.		Regular meetings with COP sub-contractors. Ensure providing information is in sub-contractor financial best interest.
	If referral quality is poor, then mobilisation of SPA in the community will be challenging due to difficulty in triaging, resulting in inappropriate referrals seen in HES rather than in the community		Early communication and education to GP and non-COP optoms. Work closely with CCG to ensure GPs aware of requirements.
	If community services are not connected to the NHS spine, then patients will not have an NHS number identified, resulting in reporting issues for patients partipating in Glaucoma and Post Operative Cataract Pathways.		Early involvement of IT in SPA working group. Work collaboratively with CCG and COP to find solution.
	If there are delays with implementing generic digital solution, then tele-ophthalmology pathway will be delayed, resulting in the service not starting by the Go-Live date.		Weekly update meetings with IT and digital platform solutions. Any further delays to be dealt with by director of IT.
	If there is no additional available space in the community locations then there will be no space to run the post-op cataract service, resulting in the service not starting by the Go-Live date.		Space to be identified at current locations. Space to be identified at alternative locations.
	If there are a high level of staffing vacancies within COP then delays in setting up new services may occur, resulting in the service not starting by the Go-Live date.		Advertise promptly following resignations. Find interim cover .
	If there are a high level of staffing vacancies within HES then delays in setting up new services may occur, resulting in the service not starting by the Go-Live date.		Advertise promptly following resignations. Find interim cover .
	If COP Optometrists do not have adequate equipment to support new services eg OCT, Visual Fields, Tonometers will delay the start of new pathways.		Engage and review current equipment with COP Optometrists.
	If COP Optometrists have insufficient training to serve the new pathways then the services will have to be delayed.		Engage and review training requirements for different pathways with COP Optometrists.
	If DXS Form is not uploaded by CCG in time for go live, then this compromises the GP engagement, resulting in inaffective mobilisation.		Submit amended DXS form as soon as possible CCG to obtain clinical approval within 2 weeks. CCG to upload to system without delay.
	Information Governance compliance not signed off.		IG compliance check in process. COP already have ERS access in their own right to book into MEH clinics, so no change to process but change to governance as they will now be sub-contractors. Change in access is for MEH to access community level data.
	Poor General Practitioner (GP) compliance with process due to lack of GP engagement by CCG on new SPA pathway. May result in GPs using the various different referral forms and routes that they do currently.		CCG to launch communication and engagement with GPs. MEH to provide additional administrative support for 8 weeks after launch to enable prompt feedback and redirect of inappropriate referrals.
	Contract risks
	COP1 – No COP contract could lead to no provider of community services.		Meet with COP timely to finalise governance, finance, activity and other issues to reach agreement to enable signing of contract. COP motivated to maintain activity and income & have been engaged throughout process
	COP2 – No COP contract could lead to CCG retendering the service.		Meet with COP to finalise governance, finance, activity and other issues to reach agreement to enable signing of contract. COP motivated to maintain activity and income & have been engaged throughout process If re-tendered interim extension of existing contracts would have to be issued by CCG to ensure continuity of care
	COP3 – Indeminity and Care Quality Commitee (CQC) risks - requirement to register COP with CQC/ extend MEH CQC registration to services covered in this contract. If required, we are unable to proceed with go-live until registration has been extended to COP.		Awaiting confirmation of requirement. If an amendment to the trust's registration is required then the best option is to request an extension to cover the service. It is possible to do this in the timeframe required.
	Finance & Activity Reporting – Not being able to access patient level data in future could lead to non-payment of activity. This is a longer term risk than a current one.		Processed data available. Does not stop go live

## Sheet: Approved Requirements_KPI's
	LOCAL OPERATIONAL STANDARDS AND LOCAL QUALITY REQUIREMENTS: A REALISTIC APPROACH
	Ref	Operational Standards	Method of Measurement	Threshold
	Single Point of Access
	IOS.1	Advice and Guidance response will be provided within 2 working days	Service activity reporting - % of Advice and guidance provided within 48 hours from receipt of referral (excluding requests made that would span hours when service is closed)	0.95
	IOS.2	Initial referral assessment completed within 1 working day	Proportion of total assessments received vs proportion directed to relevant service	95%
	IOS.3	Proportion of total patients assessed referred to community service	Service activity reporting – Based on expected level of plan activity to be seen in the community	TBC
	IOS.4	Source of referrals to Community Ophthalmology Service (COS)	Service activity reporting - Referral sources to COS practices monitored i.e self referral, SPA, GP directed	NA
	IOS.5	Proportion of total patients assessed referred to HES	Service activity reporting – Based on expected level of plan activity to be seen in HES	TBC
	IOS.6	Proportion of total patients assessed and referred to Rapid Access	Service activity reporting – Based on expected level of plan activity to be seen in Rapid Access Clinic	TBC
	Outpatient Standards -Community & HES
	IOS.7	Patients triaged by the SPA for a 1st appointment in the community are sent an appointment offer letter within 3 working days	Service Activity Reporting	98%
	IOS.8	Community Referral Refinement - Suspected Cataract & Glaucoma of patients are seen within four weeks.	Patients with suspected (Chronic open angle glaucoma (COAG)/Cataract seen within four weeks.	95%
	IOS.9	Patients who contact a COS practice as a result of a SPA triage appointment offer letter are offered an appointment within 4 weeks	Proportion of total patients referred to community that attended an appointment that were seen within 4 weeks	98%
	IOS.10	Proportion of extended hours (8am-9am and 6pm-8pm) and weekend slots offered	Proportion of total appointment slots available during extended hours	Yr. 1 10% Yr. 2 15%
	IOS.11	Training packages delivered for "Know your drops" to Integrated Care Network pharmacists	Annual records of number ICN pharmacists that have had the Know your drops training	100% by October 2020
	IOS.12	Patient with a newly diagnosed eye condition are seen by ECLO within 5 working days (routine) or 2 working days (urgent)	90% of newly diagnosed patients who are offered and accept an ELCO appointment are seen within 5 working days (routine) or 2 working days (urgent)	90%
	IOS.13	Patients referred to Croydon Vision by ECLO as part of prevention pathway	100% of patients that are seen by ECLO and wish to be referred to Croydon Vision for continued support	100%
	IOS.14	Consultant completing Certificate of Vision Impairment (CVI) for patients where appropriate	Number of patients diagnosed as severely sight impaired or sight impaired provided with CVI Improvement on the per 100,000 rate of CVIs from existing to England rate	100%
	Rapid Access Service Standards
	IOS.15	Proportion of patients assessed and seen within 2 weeks (non-same day)	% of patients referred with a request to be seen within 2 weeks (non-same day)	100%
	Medicines Management & Prescribing
	Ref	Operational Standards	Method of Measurement	Threshold
	IOS.16	Indicators of high cost expenditure in ophthalmology medicines in primary care Prescribing QIPP	Monthly activity reporting: high cost drugs	N/A
	Ref	Quality Requirement	Method of Measurement	Threshold
	Single Point of Access
	IOS.Q1	More referrals will be managed in Primary Care through provision of advice and guidance service	Quarterly quality report: Analysis of advice and guidance service	5%> of total activity referred to the SPA
	IOS.Q2	Reduce the volume of patients required to access the Rapid Access Service due to more proactive management	Quarterly quality report: Analysis Rapid Response service	20%
	Outpatient Standards -Community & HES
	IOS.Q3	Promoting the increased use of non-face to face appointment for follow up attendances in community and hospital setting	Feasibility study in Y1 of the contract to establish proportion of non-face to face consultations that are possible as a share of total follow up appointments	Y1 – N/A Y2 TBC based on feasibility study
	IOS.Q4	Proportion of tele-ophthalmology Follow UP appointments – Medical Retina	Quarterly quality report – section analysis on impact of Virtual clinic	30%
	IOS.Q5	Proportion of tele- ophthalmology Follow UP appointments – Glaucoma	Quarterly quality report – section analysis on impact of Virtual clinic	20%
	IOS.Q6	Reducing rate of DNA for all attendances	Quarterly quality report: Analysis on DNA rates trends and improvement plans	<10%
	HES & Community Service Standards
	IOS.Q7	Compliance with SWL ECI policy	6 monthly audit to include in Quality report	100%
	Prevention Service Standards
	IOS.Q8	Delivery of Community Engagement Programme	Quarterly quality report. Section to report on Engagement programme based on RNIB principles	TBC
	IOS.Q9	Health Help now is updated annually to ensure sections on eye health information are strengthened and up to date	Provider to work with Health Help Now partners to provide content.	100% app updates made on an annual basis
	IOS.Q10	The provider to develop annual communication and engagement plan	The provider will produce a detailed communication and engagement plan	100%
	Ref	Quality Requirement	Method of Measurement	Threshold
	IOS.Q11	The provider develops Standard Operating Procedures (SOP)for providing CVI as part of diagnosis pathways	Production of SOP and audit against standard	N/A
	IOS.Q12	The provider develops SOP around post ECLO support referral to 3rd Sector support i.e. Croydon Vision	Production of SOP and engagement with provider around rates of referrals	N/A
	Local Outcomes Standards
	IOS.Q13	GPs experience high levels of satisfaction with support provided through a combination of Advice and Guidance and direct engagement with primary care	Annual survey to evidence GPs high levels of satisfaction with service	80% satisfaction (minimum 20% of all GPs complete survey)
	IOS.Q14	Patients reporting high levels of patient satisfaction following treatment across service	6 Monthly Patient reported experience measures (PREM) EQ5D	80%
	IOS.Q15	Improving compliance: Patienr reported outcome measures (PROM) results of Glaucoma patients	6 monthly PROM EQ5D	Y1 Statistically significant improvement against baseline Y2: To be decided based on baseline performance
	IOS.Q16	A reduction in the proportion of Rapid Access attendances due to poor compliance with eye drops	Quarterly report to analyse reasons for use of Rapid Access	Y1 Statistically significant reduction against baseline
	IOS.Q17	Service continuously improves based on patient feedback	Quarterly reports -evidence of engagement with service users to shape continuous improvement programme
	Medicines Management & Prescribing
	IOS.Q18	Compliance with local Principles for commissioning High Cost Medicines	Quarterly Audit against compliance with Trust set standards	100%
	IOS.Q19	Compliance with NHS England guidance on deprescribing and over the counter medicines relevant to ophthalmology	Annual audit against NHS England Guidance	100%

## Sheet: Project Acronyms
Project Team Identifiers
Acronym
CCG	Clinical Commissioning Group
COP	Community Provider
MEH	Moorfields Eye Hospital
Project Acronyms
Initials	Role
CCG	Clinical Commissioning Group
MEH	Moorfields Eye Hospital
CV	Contract Variation
CtrL	Contracts Lead
CL	Clinical Lead
A&E Lead	Accident and Emergency Lead
P&I Lead	Performance and Information Lead
QP	Quality Partner
COO	Chief Operating Officer
PO	Principal Optometrist
LCM	Local Clinic Manager
Bco	Booking coordinator
IT Lead	Iinformation Technology Lead
PCRM	Primary Care Relationship Manager
PEM	Patient Experience Manager
